# Supplementary material for: Dysnatremia, its correction, and mortality in patients undergoing continuous renal replacement therapy: a prospective observational study
Source: PubMed Central journal article supplement (PMC4702339; doi:10.1186/s12882-015-0215-1), 2016-01-05

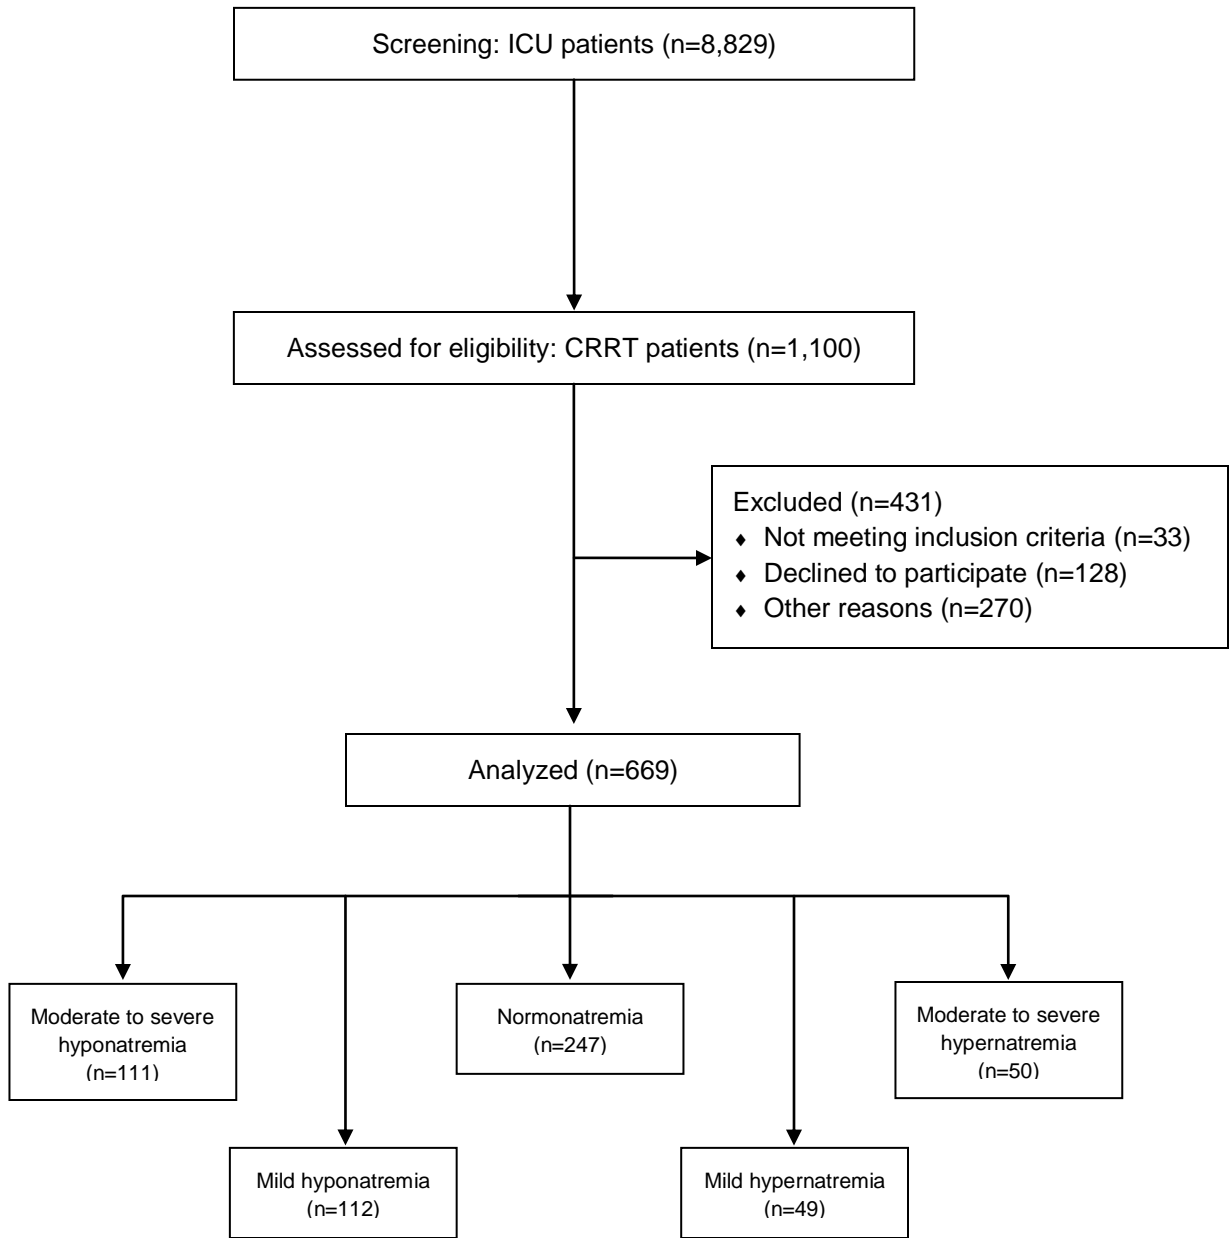

Supplement: 12882_2015_215_MOESM1_ESM.pdf [file 12882_2015_215_MOESM1_ESM.pdf]
